# Supplementary material
Source: PubMed Central journal article supplement (PMC10991956)
Supplement: 262_2021_2858_MOESM1_ESM.pdf [file 262_2021_2858_MOESM1_ESM.pdf]

**Supplemental Table 1.** Search Strategy.

| <b>Items</b>                               | <b>Contents</b>                                                                                                                                                                                                                                                                                                                                                                                                                                                                                                                                                                                                                        |
|--------------------------------------------|----------------------------------------------------------------------------------------------------------------------------------------------------------------------------------------------------------------------------------------------------------------------------------------------------------------------------------------------------------------------------------------------------------------------------------------------------------------------------------------------------------------------------------------------------------------------------------------------------------------------------------------|
| The main entry terms for the PubMed search | ("ipilimumab"[Title] OR "tremelimumab"[Title] OR "nivolumab"[Title] OR "pembrolizumab"[Title] OR "atezolizumab"[Title] OR "durvalumab"[Title] OR "avelumab"[Title] OR "immune checkpoint inhibitor"[Title] OR "immune therapy"[Title] OR "immunotherapy"[Title] OR "CTLA-4"[Title] OR "cytotoxic t lymphocyte associated protein 4"[Title] OR "PD-1"[Title] OR "programmed death receptor 1"[Title] OR "PD-L1"[Title] OR "programmed death ligand 1"[Title]) AND ("cancer"[Title] OR "cancers"[Title] OR "tumor"[Title] OR "tumors"[Title] OR "carcinoma"[Title] OR "carcinomas"[Title]). Filters: Full text, Clinical Trial, English. |
| The second literature search               | "ipilimumab"[Title] OR "tremelimumab"[Title] OR "nivolumab"[Title] OR "pembrolizumab"[Title] OR "atezolizumab"[Title] OR "durvalumab"[Title] OR "avelumab"[Title] OR "immune checkpoint inhibitor"[Title] OR "immune therapy"[Title] OR "immunotherapy"[Title] OR "CTLA-4"[Title] OR "cytotoxic t lymphocyte associated protein 4"[Title] OR "PD-1"[Title] OR "programmed death receptor 1"[Title] OR "PD-L1"[Title] OR "programmed death ligand 1"[Title]) AND ("body mass index"[Title] OR "obesity"[Title] OR "overweight"[Title]). Filters: Full text, Clinical Trial, English.                                                    |
